# Supplementary material
Source: publisher figshare collection journal article supplement (https://sage.figshare.com/ndownloader/files/13086020)
Supplement: Supplementary file 1 [file 13086020]

## Tables

**Supplementary Table 1** Excluded randomised controlled trials found from search strategy and reason.

| No | Excluded randomised controlled trials found from search strategy                                                                                                                                | Reason                        |
|----|-------------------------------------------------------------------------------------------------------------------------------------------------------------------------------------------------|-------------------------------|
| 1. | Backward walking training to improve mobility in acute stroke: A pilot study <sup>1</sup>                                                                                                       | Poster                        |
| 2. | Effect of retro and forward walking on quadriceps muscle strength, pain, function, and mobility in patients with knee osteoarthritis: a protocol for a randomized controlled trial <sup>2</sup> | Protocol                      |
| 3. | Effect of backward walking treadmill training on walking capacity after stroke: a randomized clinical trial <sup>3</sup>                                                                        | Protocol                      |
| 4. | Effectiveness of backward walking treadmill training in lower extremity function after stroke <sup>4</sup>                                                                                      | Chinese Language              |
| 5. | Forward and backward locomotion in individuals with dizziness <sup>5</sup>                                                                                                                      | Not gait impairment condition |
| 6. | Warm-up reduces delayed onset muscle soreness but cool-down does not: a randomised controlled trial <sup>6</sup>                                                                                | Healthy subjects              |

**Supplementary Table 2.** Summary of included studies (n = 21)

| <b>Experimental group vs control group</b> | <b>Study/condition</b>                                                  | <b>Design</b>   | <b>Participants</b>                                                                                | <b>Intervention</b>                                                                                                                                                                               | <b>Outcome measures</b>                             |
|--------------------------------------------|-------------------------------------------------------------------------|-----------------|----------------------------------------------------------------------------------------------------|---------------------------------------------------------------------------------------------------------------------------------------------------------------------------------------------------|-----------------------------------------------------|
| <b>1. BW with CPT vs CPT</b>               | <b>Rathi et al <sup>31</sup> (2017)</b><br><b>Low back pain</b>         | RCT             | Exp: n= 15<br>Mean age 36.73<br>Con: n = 15<br>Mean age 34                                         | Exp = Backward walking (BW) 10 min/session, 5 sessions/day x 4 weeks with conventional physiotherapy treatment (CPT) 10 min<br>Con = CPT 10 min<br>CPT = Heat therapy and strengthening exercises | NPRS<br>Core muscle strength<br>Follow-up = 4 weeks |
|                                            | <b>Rangey et al <sup>27</sup> (2017)</b><br><b>Knee osteoarthritis</b>  | Quasi Exp study | Exp: n = 10 (4M, 6F)<br>Mean age 53.4 ± 8.9<br>Con : n = 10 (1M, 9F)<br>Mean age 49.0 ± 7.2        | Exp = BW with CPT 20 min/session, 2 sessions/day x 2 weeks<br>Con 1 = CPT 10 min/day x 2 weeks<br>CPT = Heat therapy, strengthening and stretching exercises.                                     | VAS<br>WOMAC<br>Follow-up = 2 weeks                 |
|                                            | <b>Wadhwa et al <sup>24</sup> (2016)</b><br><b>Knee osteoarthritis</b>  | RCT             | Exp: n = 17 (7 M, 10 F)<br>Mean age 65.65 ± 4.26<br>Con: n = 15(6 M, 9 F)<br>Mean age 67.59 ± 4.78 | Exp = BW 10 min/session, 3 weeks with CPT<br>Con = CPT 5 sessions hold/2 sessions of rest, 10 repetitions, 3 days/week for 3 weeks<br>CPT = Heat therapy and strengthening exercises              | NPRS<br>WOMAC<br>Follow-up = 3 weeks                |
|                                            | <b>Anadkat et al <sup>32</sup> (2015)</b><br><b>Knee osteoarthritis</b> | RCT             | Exp: n = 20 (8M, 12F)<br>Mean age 51.30 ± 6.48<br>Con: n = 20 (11M, 9F)<br>Mean age 49.95 ± 6.93   | Exp = BW 10 min/session, 5 days/week (3 weeks) with CPT 20 min/day<br>Con = CPT 20 min/day                                                                                                        | VAS<br>WOMAC<br>Follow-up = 3 weeks                 |

| Author (Year)                                                                 | Study Design | Participants (n, Age)                                                                        | Intervention                                                                                                                                                        | Outcome Measures                                                                           |
|-------------------------------------------------------------------------------|--------------|----------------------------------------------------------------------------------------------|---------------------------------------------------------------------------------------------------------------------------------------------------------------------|--------------------------------------------------------------------------------------------|
| <b>Manisha et al</b> <sup>25</sup><br>(2015)<br><b>Knee osteoarthritis</b>    | RCT          | Exp: n = 15<br>Con: n = 15<br>Age = 40 – 60                                                  | Exp = BW 10 min/session, 4 weeks with CPT<br>Con = CPT 4 weeks<br>CPT = Heat therapy and strengthening exercises                                                    | Step test<br>WOMAC<br>Follow-up = 4 weeks                                                  |
| <b>Rathi et al</b> <sup>23</sup><br>(2014)<br><b>Knee osteoarthritis</b>      | RCT          | Exp: n = 10<br>Mean age 53.9 ± 5.7<br>Con: n = 10<br>Mean age 53.2 ± 8.24                    | Exp = BW 10 min/session, 3 days/week (2 weeks) with CPT 20 min/day<br>Con = CPT 20 min/day<br>CPT = Heat therapy, strengthening and stretching exercises            | NPRS<br>Reduced WOMAC<br>Quadriceps strength<br>Follow-up = 2 weeks                        |
| <b>Gondhalekar et al</b> <sup>9</sup><br>(2013)<br><b>Knee osteoarthritis</b> | RCT          | Exp: n = 15 (8M)<br>Con: n = 15 (7M)<br>Mean age 63.43 ± 6.202                               | Exp = BW 10 min/session, 3 sessions/day x 3 weeks with CPT<br>Con = CPT 20 min/session, 2 sessions/day x 3 weeks<br>CPT = Heat therapy and strengthening exercises. | VAS<br>WOMAC<br>Concentric strength of hip abductors and extensors,<br>Follow-up = 3 weeks |
| <b>Khyatee et al</b> <sup>30</sup><br>(2013)<br><b>Knee pain</b>              | RCT          | Exp: n = 15 (9M, 6F)<br>Mean age 38.8 ± 8.55<br>Con: n = 15 (7M, 8F)<br>Mean age 36.6 ± 9.47 | Exp = BW 2 to 2.5 km/hr for 5 min, 10 days with CPT<br>Con = CPT 10 repetitions, 3 sets/day, 10 days<br>CPT = Strengthening exercises                               | VAS<br>Quadriceps strength<br>Follow-up = 10 days                                          |

**2. BW with CPT including other gait training vs CPT including other gait training**

|                                                                                        |     |                                                                                         |                                                                                                                                                                                                                                                      |                                                                              |
|----------------------------------------------------------------------------------------|-----|-----------------------------------------------------------------------------------------|------------------------------------------------------------------------------------------------------------------------------------------------------------------------------------------------------------------------------------------------------|------------------------------------------------------------------------------|
| <b>Yong Kim et al<sup>28</sup> (2017)</b><br><b>Stroke</b>                             | RCT | Exp: n = 17<br>Mean age 63.35 ± 7.27<br>Con: n = 17<br>Mean age 63.33 ± 11.60           | Exp = BW with CPT 30 min, 3x/week, 3 weeks<br>Con = CPT 30 min, 3x/week, 3 weeks<br>CPT = functional mobility and strengthening exercises included with other gait training                                                                          | Gait velocity<br>Cadence<br>Stride length<br>Follow-up = 3 weeks             |
| <b>El Aziz et al<sup>38</sup> (2017)</b><br><b>Juvenile rheumatoid arthritis</b>       | RCT | Exp: n = 15 (18G, 12B)<br>Mean age 7.06 ± 1.24<br>Con : n = 15<br>Mean age 7.38 ± 1.18  | Exp = BW 20 min, 3 sessions/week, 12 weeks with CPT 60 min 3 sessions/week, 12 weeks<br>Con = CPT 60 min 3 sessions/week, 12 weeks<br>CPT = stretching and strengthening exercises included with other gait training                                 | Berg balance scale<br>Overall stability<br>Follow-up = 12 weeks              |
| <b>El Basatiny et al<sup>39</sup> (2014)</b><br><b>Cerebral palsy</b>                  | RCT | Exp: n = 15 (14G, 16B)<br>Mean age 11.98 ± 1.21<br>Con: n = 15<br>Mean age 12.51 ± 1.27 | Exp = BW 25 min, 3 sessions/week, 12 weeks with CPT 60 min 3 sessions/week, 12 weeks<br>Con = CPT 60 min 3 sessions/week, 12 weeks<br>CPT = training for postural stability stretching and strengthening exercises included with other gait training | Overall stability<br>Follow-up = 12 weeks                                    |
| <b>Khadilkar et al<sup>29</sup> (2011)</b><br><b>Anterior cruciate ligament injury</b> | RCT | Exp: n = 15<br>Mean age 25.48 ± 4.43<br>Con: n = 15<br>Mean age 25.88 ± 3.47            | Exp = BW 10 min/day with CPT<br>Con = CPT 20 min/day, 4 weeks<br>CPT = strengthening exercises included with other gait training                                                                                                                     | Quadriceps and hamstring strength<br>Step length<br>Stride length<br>Cadence |

|                                                                                  |                                                                     |     |                                                                                                                                                                            |                                                                                                                                                                                                                                                                                                                                                                                           | Follow-up =<br>4 weeks                                                                |
|----------------------------------------------------------------------------------|---------------------------------------------------------------------|-----|----------------------------------------------------------------------------------------------------------------------------------------------------------------------------|-------------------------------------------------------------------------------------------------------------------------------------------------------------------------------------------------------------------------------------------------------------------------------------------------------------------------------------------------------------------------------------------|---------------------------------------------------------------------------------------|
|                                                                                  | <b>Takami et al</b> <sup>11</sup><br><b>(2010)</b><br><b>Stroke</b> | RCT | Exp: n = 12 (6M),<br>Mean age 66.1 ± 6.3,<br>Hemiplegic side (right 7)<br>Con: n = 12 (5M),<br>Mean age 66.9 ± 10.6,<br>Hemiplegic side (right 10)                         | Exp = Partial body weight supported<br>BW training on treadmill with CPT<br>Con = Partial body weight<br>supported forward walking (FW)<br>training on treadmill with CPT<br>30 min of CPT and 10 min of walking<br>training - either backward or forward;<br>total 40 min, 6 x/week (3weeks)<br>CPT = functional mobility and<br>strengthening exercises, included with<br>gait training | Berg balance<br>scale<br>Velocity<br>Cadence<br>Step length<br>Follow-up = 3<br>weeks |
|                                                                                  | <b>Yang et al</b> <sup>2</sup><br><b>(2005)</b><br><b>Stroke</b>    | RCT | Exp: n = 13 (10M)<br>Mean age 63.38 ± 7.7<br>Hemiplegic side (right 8)<br>Con: n = 12 (9M)<br>Mean age 63.42 ± 11.06<br>Hemiplegic side (right 8)                          | Exp = BW training for 30 min with<br>CPT for 40 min, 3x/week (3<br>weeks). Con = CPT 40 min;<br>3x/week (3 weeks).<br>CPT = functional mobility and<br>strengthening exercises, included with<br>other gait training                                                                                                                                                                      | Velocity<br>Cadence<br>Stride<br>length Follow-up = 3<br>weeks                        |
| <b>3. BW with CPT vs<br/>CPT with other gait<br/>/physiotherapy<br/>training</b> | <b>Rose et al</b> <sup>40</sup><br><b>(2018)</b><br><b>Stroke</b>   | RCT | Exp: n = 10 (4M, 4F)<br>Mean age 53.8 ± 12.1<br>Hemiplegic side (right 3,<br>left 5)<br>Con: n = 8 (2M, 6F)<br>Mean age 66.6 ± 7.3<br>Hemiplegic side (right 3,<br>left 5) | Exp = BW with CPT<br>Con = CPT with standing<br>balance training<br><br>CPT = other physiotherapy training                                                                                                                                                                                                                                                                                | Berg balance<br>scale<br>Follow-up =<br>12 weeks                                      |

---

|                                     |                                                                                  |     |                                                                                                                                                                           |                                                                                                                                                                                                                                                           |                                                                                                    |
|-------------------------------------|----------------------------------------------------------------------------------|-----|---------------------------------------------------------------------------------------------------------------------------------------------------------------------------|-----------------------------------------------------------------------------------------------------------------------------------------------------------------------------------------------------------------------------------------------------------|----------------------------------------------------------------------------------------------------|
|                                     | <b>Abdel aziem and El Basatiny</b> <sup>37</sup> (2016)<br><b>Cerebral palsy</b> | RCT | Exp: n = 15 (14G, 16B)<br>Mean age $11.63 \pm 1.40$<br>Con: n = 15<br>Mean age $11.46 \pm 1.43$                                                                           | Exp = BW 25 min, 3 sessions/week, 12 weeks with CPT 60 min<br>3 sessions/week, 12 weeks<br>Con = CPT 60 min, 3 sessions/week, 12 weeks<br>CPT = training for postural stability stretching and strengthening exercises, included with other gait training | Step length<br>Walking velocity<br>Cadence<br>Follow-up = 12 weeks                                 |
|                                     | <b>Walusiak et al</b> <sup>36</sup> (2008)<br><b>Senile osteoporosis</b>         | RCT | Exp: n = 20 (F)<br>Mean age $72.5 \pm 5.62$<br>Con: n = 17 (F)<br>Mean age $72.7 \pm 6.08$                                                                                | Exp = BW with CPT 10 min/session, 5 sessions/day x 3 weeks<br>Con = CPT with gait training (FW) 10 min/session, 5 sessions/day x 3 weeks<br>CPT = balance, strengthening and stretching exercises                                                         | Quadriceps strength<br>Follow-up = 3 weeks                                                         |
| <b>4. BW vs other gait training</b> | <b>Grobbelaar et al</b> <sup>26</sup> (2017)<br><b>Parkinson's disease</b>       | RCT | Exp: n = 16<br>Mean age $72 \pm 6$<br>Con: n = 15<br>Mean age $70 \pm 11$                                                                                                 | Exp = BW<br>Con = gait training (Forward walking) 45-60min, 3 sessions/week, 8 weeks                                                                                                                                                                      | Gait speed<br>Cadence<br>Stride length<br>Double limb support<br>Follow-up = 8 weeks               |
|                                     | <b>Kim et al</b> <sup>35</sup> (2017)<br><b>Stroke</b>                           | RCT | Exp: n = 15 (11M, 4F),<br>Mean age $48.27 \pm 16.05$ ,<br>Hemiplegic side (right 5)<br>Con: n = 15 (7M, 8F),<br>Mean age $50.73 \pm 13.50$ ,<br>Hemiplegic side (right 7) | Exp = Progressive body weight supported treadmill BW training 30min/day, 5x/week, 8 weeks<br>Con = Progressive body weight supported treadmill FW training                                                                                                | Step length<br>Stride length<br>Single limb support<br>Double limb support<br>Step time<br>Cadence |

---

---

|                                 |                                                                                            |     |                                                                                                                                           |                                                                                                                                                   |                                                                        |
|---------------------------------|--------------------------------------------------------------------------------------------|-----|-------------------------------------------------------------------------------------------------------------------------------------------|---------------------------------------------------------------------------------------------------------------------------------------------------|------------------------------------------------------------------------|
|                                 |                                                                                            |     |                                                                                                                                           |                                                                                                                                                   | Follow-up = 8 weeks                                                    |
|                                 | <b>Kim et al</b> <sup>34</sup><br><b>(2014)</b><br><b>Stroke</b>                           | RCT | Exp: n = 12 (8M), Mean age 51.00 ± 14.60, Hemiplegic side (right 6)<br>Con: n = 12 (8M), Mean age 52.75 ± 9.21, Hemiplegic side (right 6) | Exp = Progressive body weight supported treadmill BW training 30min/day, 6 weeks<br>Con = Progressive body weight supported treadmill FW training | Step length<br>Single limb support<br>Step time<br>Follow-up = 6 weeks |
| <b>5. BW vs no intervention</b> | <b>Zhang et al</b> <sup>33</sup><br><b>(2014)</b><br><b>Diabetic peripheral neuropathy</b> | RCT | Exp: n = 30 (16M), Mean age 52.7 ± 6.5<br>Con: n = 30 (16M), Mean age 52.7 ± 6.2                                                          | Exp = BW<br>Con = No intervention                                                                                                                 | Plantar pressure<br>Follow-up = 12 weeks                               |

---

Exp = experimental group, Con = control group, M = male, F = female, n = number of participants, RCT = randomized control studies, BW = backward walking, FW = forward walking, CPT = conventional physiotherapy treatment, VAS = visual analogue scale, NPRS = numerical pain rating scale, WOMAC = Western Ontario and McMaster Universities Arthritis Index.

**Supplementary Table 3.** PEDro scale scores for included studies (n =21)

| <b>Based on intervention</b>                                                             | <b>Study/condition</b>                                     | <b>1.</b> | <b>2.</b> | <b>3.</b> | <b>4.</b> | <b>5.</b> | <b>6.</b> | <b>7.</b> | <b>8.</b> | <b>9.</b> | <b>10.</b> | <b>Total<br/>(0-10)</b> |
|------------------------------------------------------------------------------------------|------------------------------------------------------------|-----------|-----------|-----------|-----------|-----------|-----------|-----------|-----------|-----------|------------|-------------------------|
| <b>1. BW with CPT vs CPT</b>                                                             | <b>Rathi et al <sup>31</sup> (2017) LBP</b>                | Y         | N         | Y         | N         | N         | N         | Y         | N         | Y         | Y          | 5                       |
|                                                                                          | <b>Rangey et al <sup>27</sup> (2017) OA knee</b>           | N         | N         | N         | N         | N         | N         | N         | N         | Y         | Y          | 2                       |
|                                                                                          | <b>Wadhwa et al <sup>24</sup> (2016) OA knee</b>           | Y         | N         | Y         | N         | N         | N         | Y         | N         | Y         | Y          | 5                       |
|                                                                                          | <b>Anadkat et al <sup>32</sup> (2015) OA knee</b>          | Y         | Y         | Y         | N         | N         | N         | Y         | N         | Y         | Y          | 6                       |
|                                                                                          | <b>Manisha et al <sup>25</sup> (2015) OA knee</b>          | Y         | N         | Y         | N         | N         | N         | Y         | N         | Y         | Y          | 5                       |
|                                                                                          | <b>Rathi et al <sup>23</sup> (2014) OA knee</b>            | Y         | N         | Y         | N         | N         | N         | Y         | N         | Y         | Y          | 5                       |
|                                                                                          | <b>Gondhalekar et al <sup>9</sup> (2013) OA knee</b>       | Y         | N         | Y         | N         | N         | N         | Y         | N         | Y         | Y          | 5                       |
| <b>2. BW with CPT including other gait training vs CPT including other gait training</b> | <b>Khyatee et al <sup>30</sup> (2013) Knee pain</b>        | Y         | N         | Y         | N         | N         | N         | Y         | N         | Y         | Y          | 5                       |
|                                                                                          | <b>Yong Kim et al <sup>28</sup> (2017) Stroke</b>          | Y         | Y         | Y         | N         | N         | Y         | N         | N         | Y         | Y          | 6                       |
|                                                                                          | <b>El Aziz et al <sup>38</sup> (2017) JRA</b>              | Y         | Y         | Y         | N         | N         | N         | Y         | Y         | Y         | Y          | 7                       |
|                                                                                          | <b>El Basatiny et al <sup>39</sup> (2014) CP</b>           | Y         | Y         | Y         | N         | N         | Y         | Y         | N         | N         | Y          | 6                       |
|                                                                                          | <b>Khadilkar et al <sup>29</sup> (2011) ACL</b>            | Y         | N         | Y         | N         | N         | N         | Y         | N         | Y         | Y          | 5                       |
|                                                                                          | <b>Takami et al <sup>11</sup> (2010) Stroke</b>            | Y         | N         | Y         | N         | N         | N         | N         | N         | Y         | Y          | 4                       |
|                                                                                          | <b>Yang et al <sup>2</sup> (2005) Stroke</b>               | Y         | Y         | Y         | N         | N         | N         | Y         | N         | Y         | Y          | 6                       |
| <b>3. BW with CPT vs CPT with other gait / physiotherapy training</b>                    | <b>Rose et al <sup>40</sup> (2018) Stroke</b>              | Y         | N         | Y         | N         | N         | Y         | N         | N         | Y         | Y          | 5                       |
|                                                                                          | <b>Abdel aziem and El Basatiny <sup>37</sup> (2016) CP</b> | Y         | Y         | Y         | N         | N         | Y         | Y         | N         | Y         | Y          | 7                       |



|                                    |                                                                |   |   |   |   |   |   |   |   |   |   |   |
|------------------------------------|----------------------------------------------------------------|---|---|---|---|---|---|---|---|---|---|---|
| <b>4.BW vs other gait training</b> | <b>Walusiak et al <sup>36</sup> (2008) Senile osteoporosis</b> | Y | N | Y | N | N | N | Y | N | Y | Y | 5 |
|                                    | <b>Grobbelaar et al <sup>26</sup> (2017) PD</b>                | Y | Y | Y | Y | N | N | Y | N | Y | Y | 7 |
|                                    | <b>Kim et al <sup>35</sup> (2017) Stroke</b>                   | Y | Y | Y | Y | Y | N | Y | N | Y | Y | 8 |
| <b>5.BW vs no intervention</b>     | <b>Kim et al <sup>34</sup> (2014) Stroke</b>                   | Y | N | Y | N | N | N | N | N | Y | Y | 4 |
|                                    | <b>Zhang et al <sup>33</sup> (2014) DPN</b>                    | Y | N | Y | N | N | N | Y | Y | Y | Y | 6 |

Y = yes; N = no; LBP = low back pain; OA = osteoarthritis; ACL = anterior cruciate ligament; PD = Parkinson's disease; CP = cerebral palsy; JRA = juvenile rheumatoid arthritis; DPN = diabetic peripheral neuropathy.

1. Random allocation, 2. Concealed allocation, 3. Baseline comparability, 4. Blind subjects, 5. Blind therapist, 6. Blind assessor, 7. Adequate follow-up, 8. Intention to treat, 9. Between-group comparison, 10. Point estimate and variability.

Search Name: march6 2018  
Date Run: 06/03/18 18:02:17.698  
Description:

| ID  | Search                                 | Hits                                 |        |
|-----|----------------------------------------|--------------------------------------|--------|
| #1  | walking:ti,ab,kw                       | (Word variations have been searched) | 16075  |
| #2  | gait                                   | 5720                                 |        |
| #3  | backward                               | 1101                                 |        |
| #4  | retro                                  | 239                                  |        |
| #5  | #3 and #1                              | 119                                  |        |
| #6  | #3 and #2                              | 95                                   |        |
| #7  | #4 and #1                              | 8                                    |        |
| #8  | #4 and #2                              | 6                                    |        |
| #9  | #5 or #6 or #7 or #8                   | 162                                  |        |
| #10 | randomized controlled trial:pt         |                                      | 446152 |
| #11 | controlled clinical trial:pt           |                                      | 426735 |
| #12 | randomized:ti,ab,kw                    | 521534                               |        |
| #13 | placebo:ti,ab                          | 192876                               |        |
| #14 | randomly:ti,ab                         | 169394                               |        |
| #15 | trial:ti                               | 210354                               |        |
| #16 | #10 or #11 or #12 or #13 or #14 or #15 |                                      | 864497 |
| #17 | animals not humans                     | 1310                                 |        |
| #18 | #16 not #17                            | 863621                               |        |
| #19 | #9 and #18 in Trials                   | 118                                  |        |

**Supplementary Figure 1.** Search strategy (eg: Cochrane library)

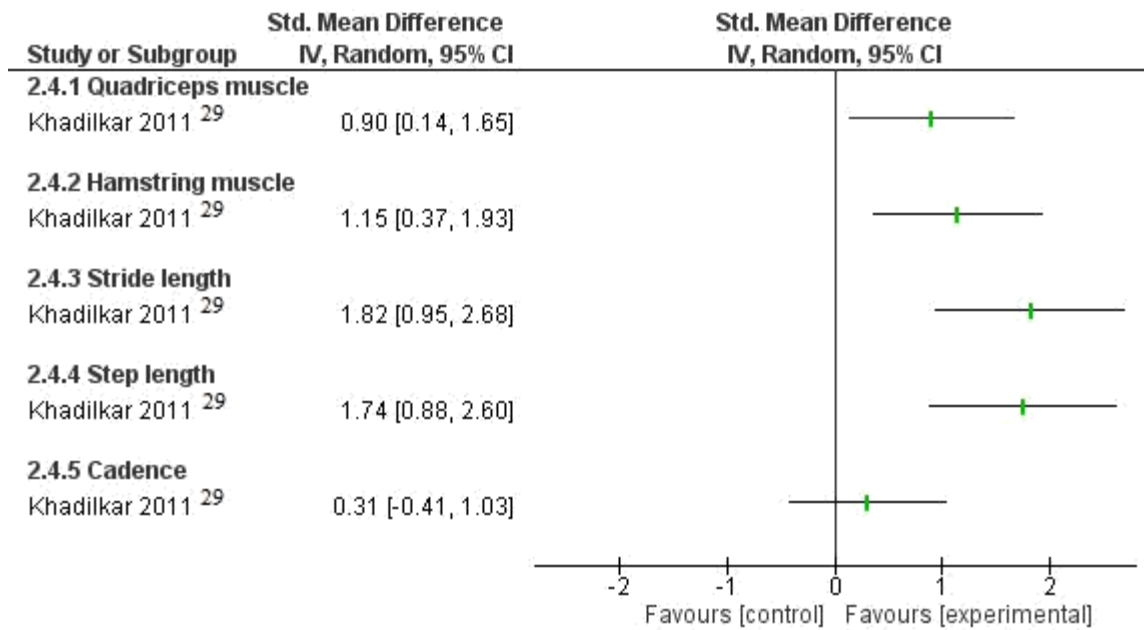

**Supplementary Figure 2.** Standardized Mean Difference (95% confidence interval) calculated from the one study for patients with anterior cruciate ligament injury who underwent backward walking with conventional physiotherapy treatment including other gait training vs conventional physiotherapy treatment including other gait training for muscular strength and gait parameters.

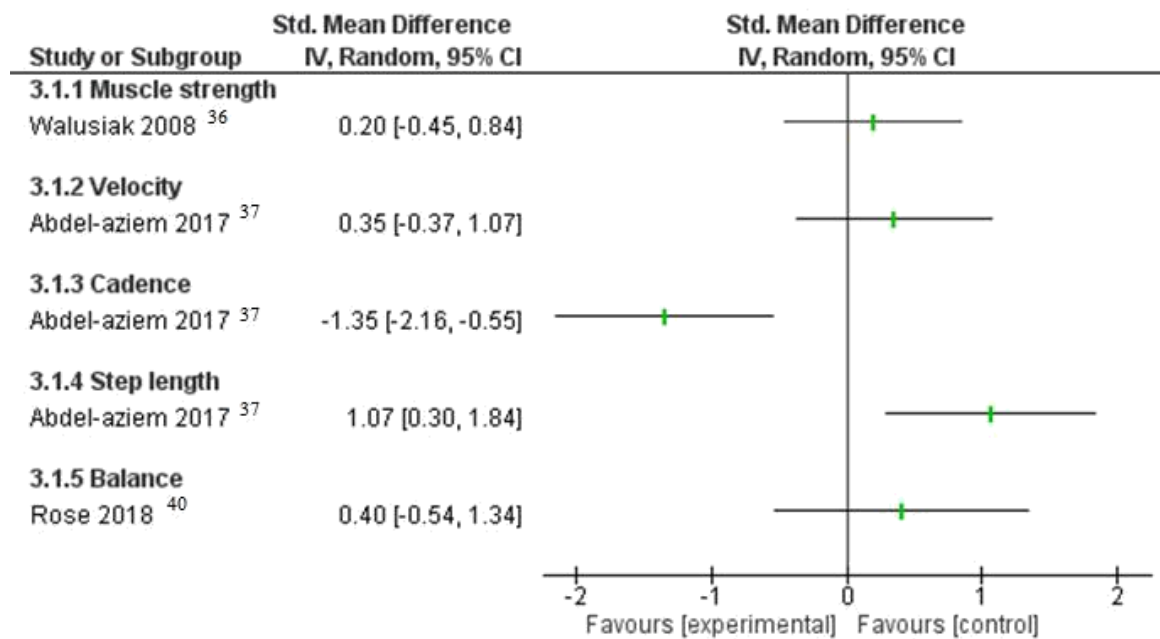

**Supplementary Figure 3.** Standardized Mean Difference (95% confidence interval) calculated for patients suffering from senile osteoporosis, cerebral palsy and stroke who underwent backward walking with conventional physiotherapy treatment *versus* conventional physiotherapy treatment with other gait/physiotherapy training. One study for muscle strength, one study for velocity, cadence and step length, and one study for balance.

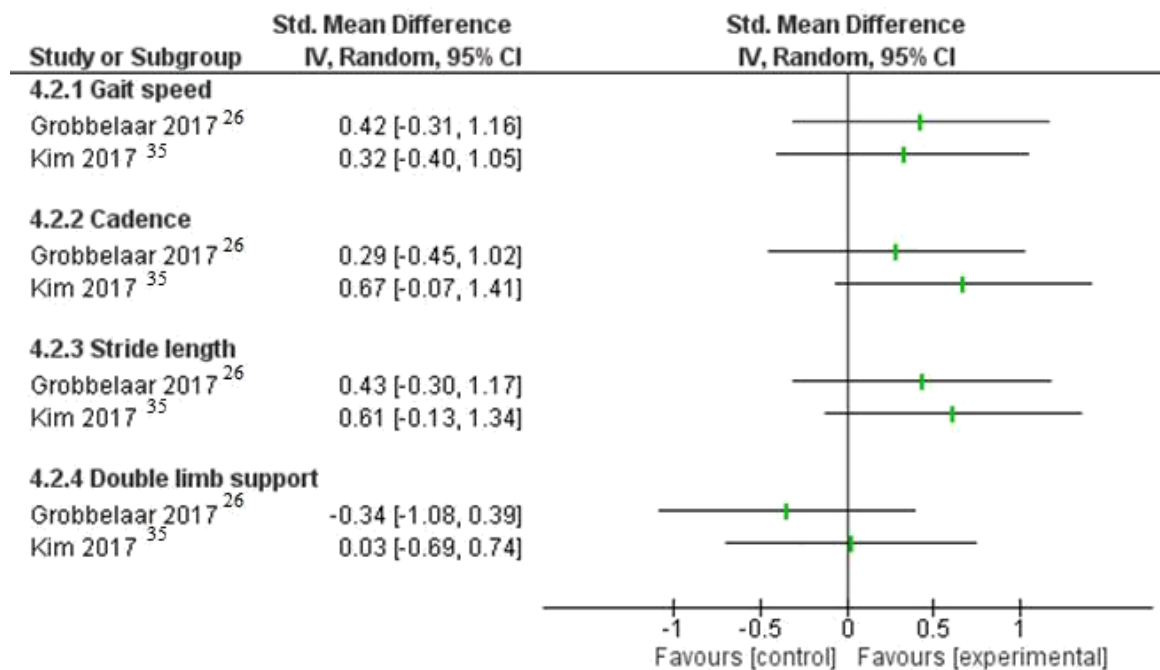

**Supplementary Figure 4.** Standardized Mean Difference (95% confidence interval) calculated from the two studies of patients with Parkinson’s disease and who suffered stroke and who underwent backward walking vs other gait training for improving gait parameters

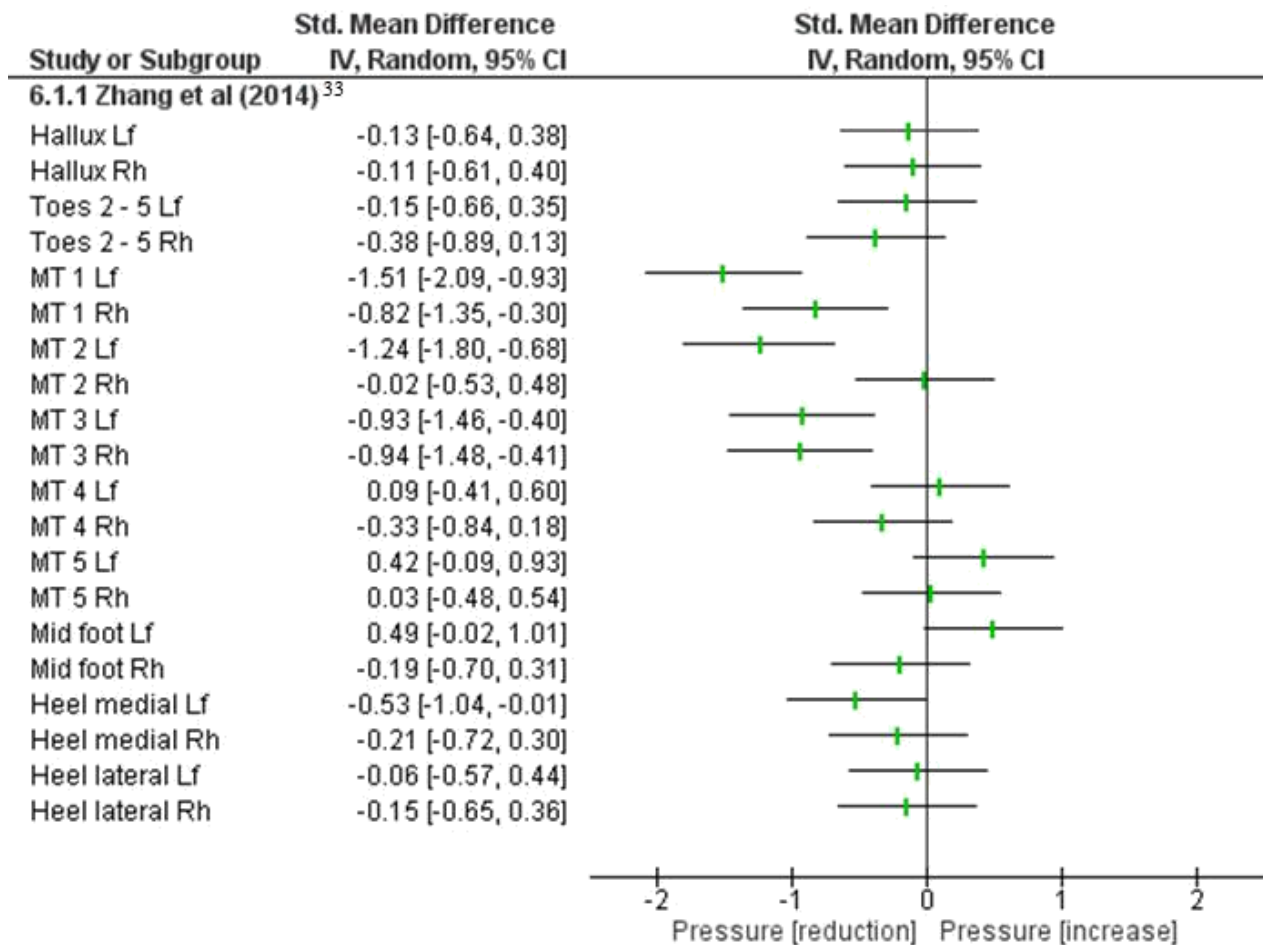

**Supplementary Figure 5.** Standardized Mean Difference (95% CI) calculated from the one study for patients with diabetic peripheral neuropathy who underwent backward walking vs no intervention to relieve plantar pressure.

## References:

1. Rose D, De Mark L. Backward walking training to improve mobility in acute stroke: A pilot study. *Arch Phys Med Rehabil* 2013; 94: e36.
2. Alghadir A, Anwer S. Effect of retro and forward walking on quadriceps muscle strength, pain, function, and mobility in patients with knee osteoarthritis: a protocol for a randomized controlled trial. *BMC Musculoskelet Disord* 2016; 17: 161.
3. Michaelsen SM, Ovando AC, Romaguera F, et al. Effect of backward walking treadmill training on walking capacity after stroke: a randomized clinical trial. *Int J Stroke* 2014; 9: 529–532.
4. Weng C, Wang J, Pan X, et al. Effectiveness of backward walking treadmill training in lower extremity function after stroke. *Zhonghua Yi Xue Za Zhi* 2006; 86: 2635–8.
5. Davalos-Bichara M, Zuniga MG, Agrawal Y, et al. Forward and backward locomotion in individuals with dizziness. *Gait Posture* 2014; 40: 499–503.
6. Law RYW, Herbert RD. Warm-up reduces delayed-onset muscle soreness but cool-down does not: a randomised controlled trial. *Aust J Physiother* 2007; 53: 91–95.
